# Supplementary material for: Phase transformation-controlled synthesis of CuO nanostructures and their application as an improved material in a carbon-based modified electrode
Source: Royal Society of Chemistry journal article supplement (doi:10.1039/c5ra22297d), 2016-01-01
Supplement: c5ra22297d1.pdf [file c5ra22297d1.pdf]

## Supporting Information

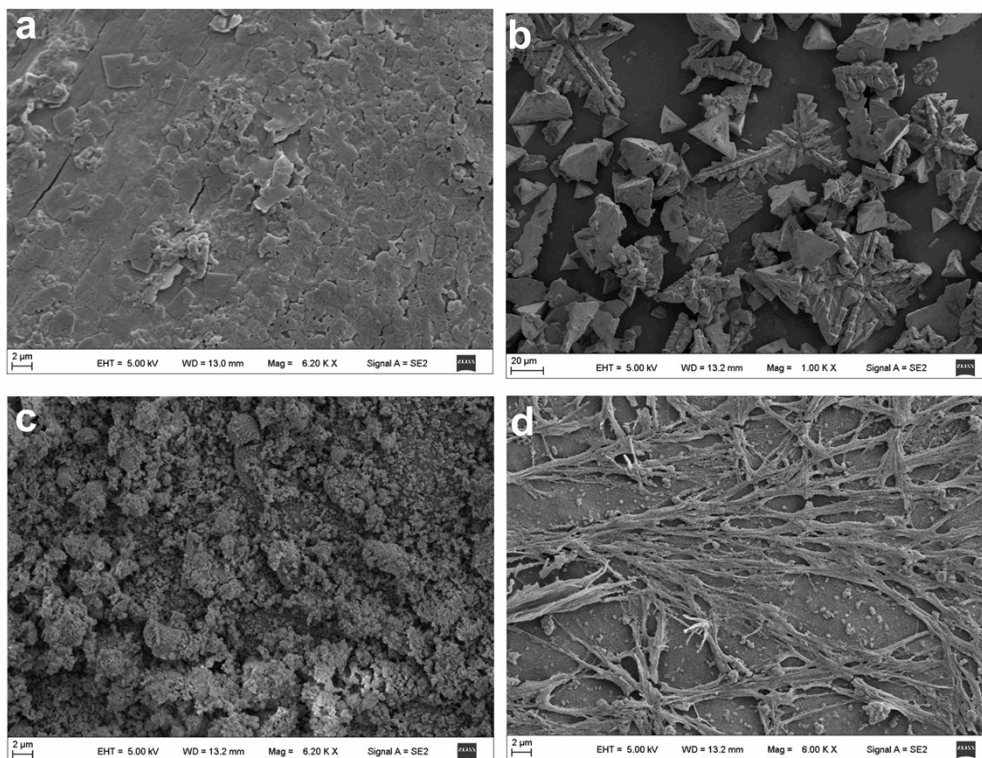

Fig S1. SEM images of  $\text{CuCl}_2$  (a),  $\text{CuCl}$  (b),  $\text{Cu}_2(\text{OH})_3\text{Cl}$  (c) and  $\text{Cu}(\text{OH})_2$  (d) provided in the chemical transformation process of as-prepared  $\text{CuO}$  nanorods preparation.

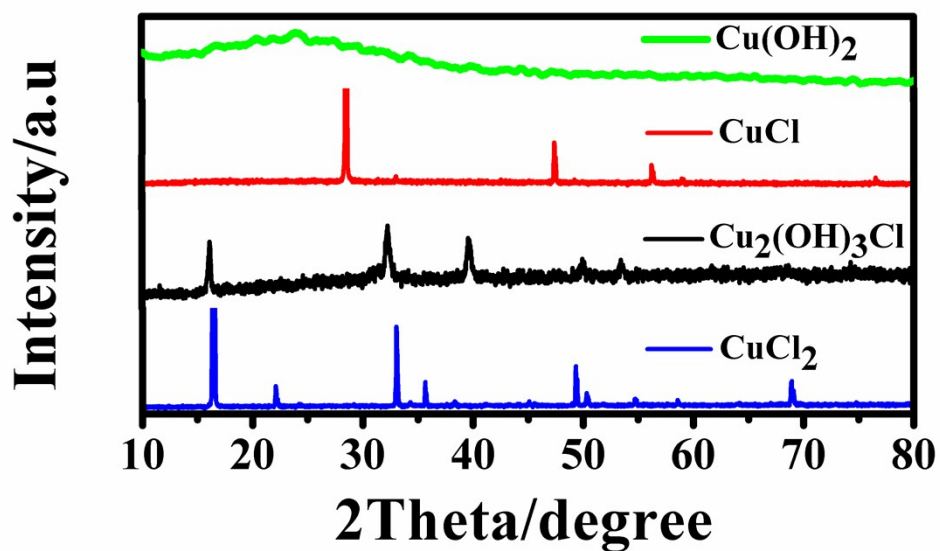

Fig S2. XRD patterns of  $\text{CuCl}_2$ ,  $\text{CuCl}$ ,  $\text{Cu}_2(\text{OH})_3\text{Cl}$  and  $\text{Cu}(\text{OH})_2$  provided in the chemical transformation process of as-prepared  $\text{CuO}$  nanorods preparation.
